# Supplementary material
Source: publisher figshare collection journal article supplement (https://tandf.figshare.com/ndownloader/files/21710886)
Supplement: Supplementary file 1 [file 21710886]

(a) Zero nutrition


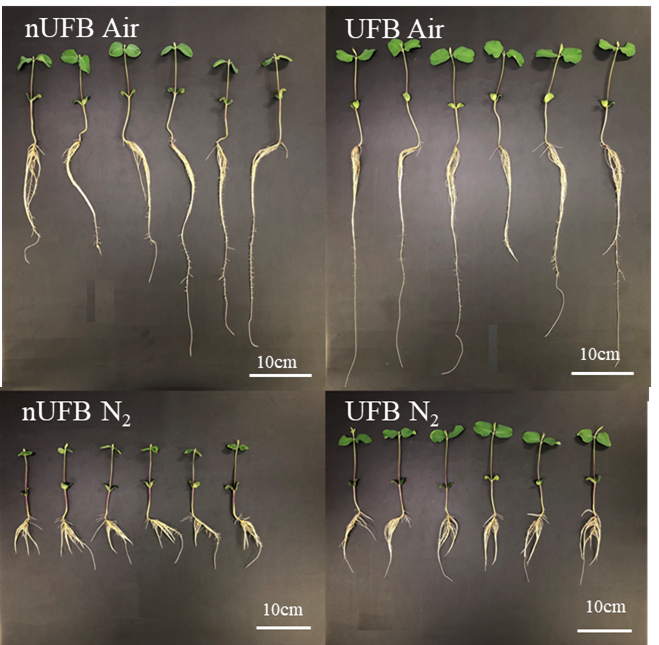


(b) High nutrition


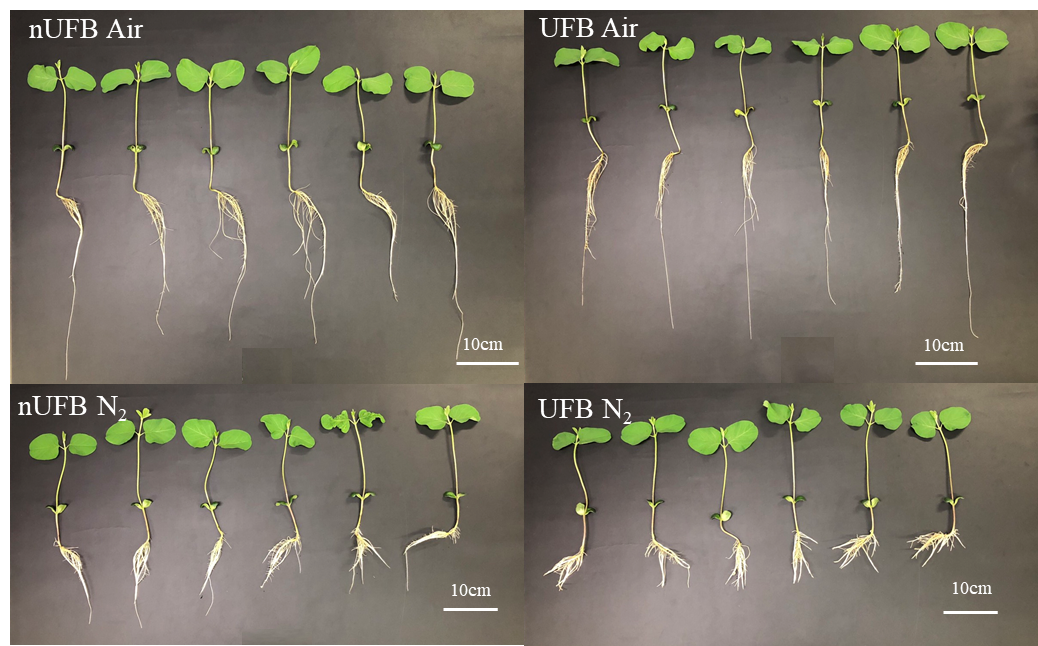


Supplemental Fig. S1. Images of soybean seedlings grown in non-UFB and UFB water under Air or N2 gas treatments, under zero or high nutrition levels.

(a) Zero nutrition

(b) Low nutrition

(c) High nutrition

Supplemental Fig. S2. Tukey-Kramer multiple comparison test for traits showing interaction effects between two treatments (Water*Gas flow, Water*Fluid movement) in 3-way ANOVA in Table 1. Means followed by the same lowercase letter were not significantly different at P < 0.05, according to Tukey-Kramer multiple comparison test.
